# Supplementary material for: Novel Eco-Synthesized Zero-valent Nanocomposite for Effective E. coli removal from Water samples: Insights from Kinetic Analysis and Response Surface Methodology
Source: Research Square preprint supplement (doi:10.21203/rs.3.rs-6315244/v1), 2025-04-28
Supplement: Supplementary file 1 [file 62ddecd5f254542538fa067d.pdf]

## Figures

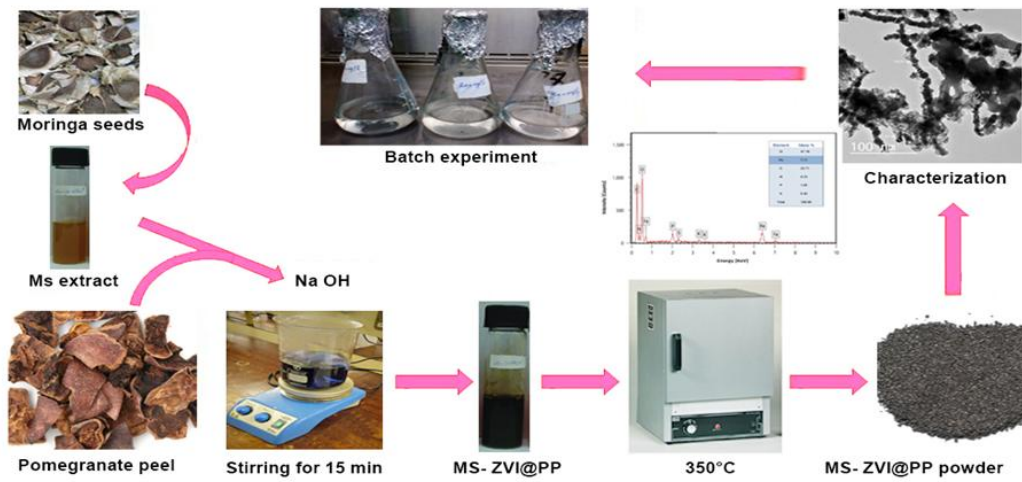

**Figure 1.** Schematic diagram for the Green Synthesis of nZVI using MO seed extract with incorporate pomegranate peel powder.

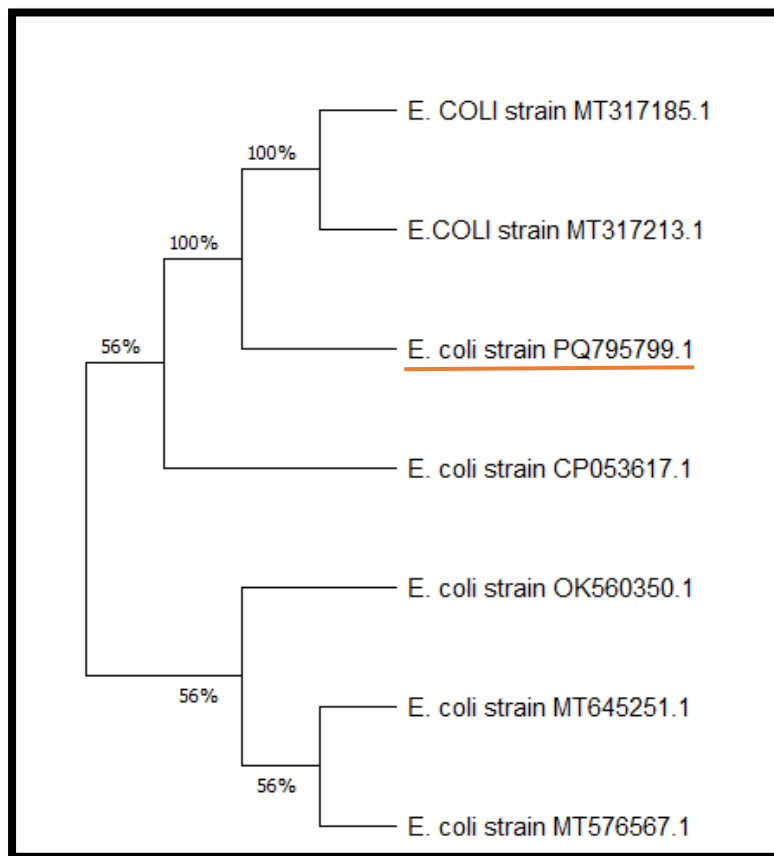

**Figure 2 |** Phylogenetic tree derived from *E. coli*'s (PQ795799.1) 16S rRNA gene sequence and other reference sequences.

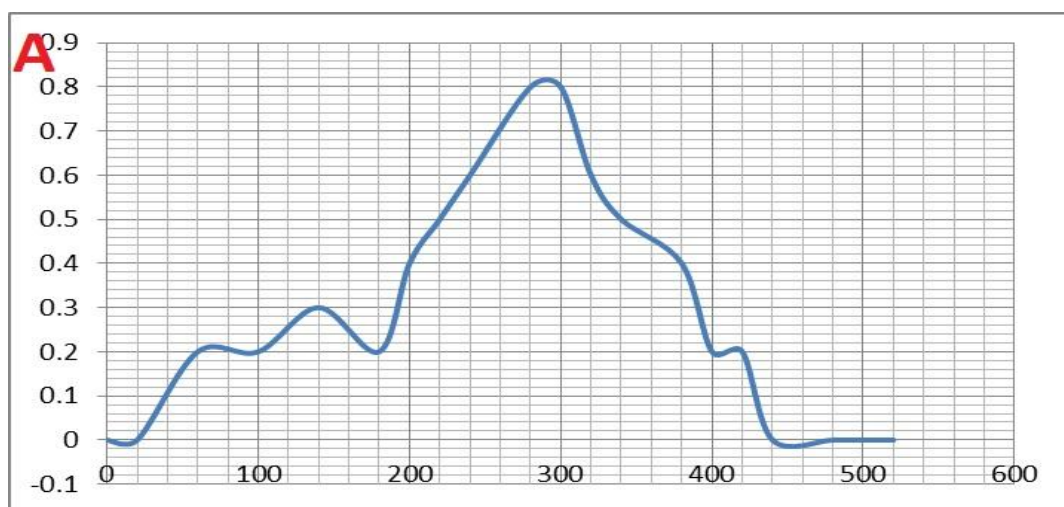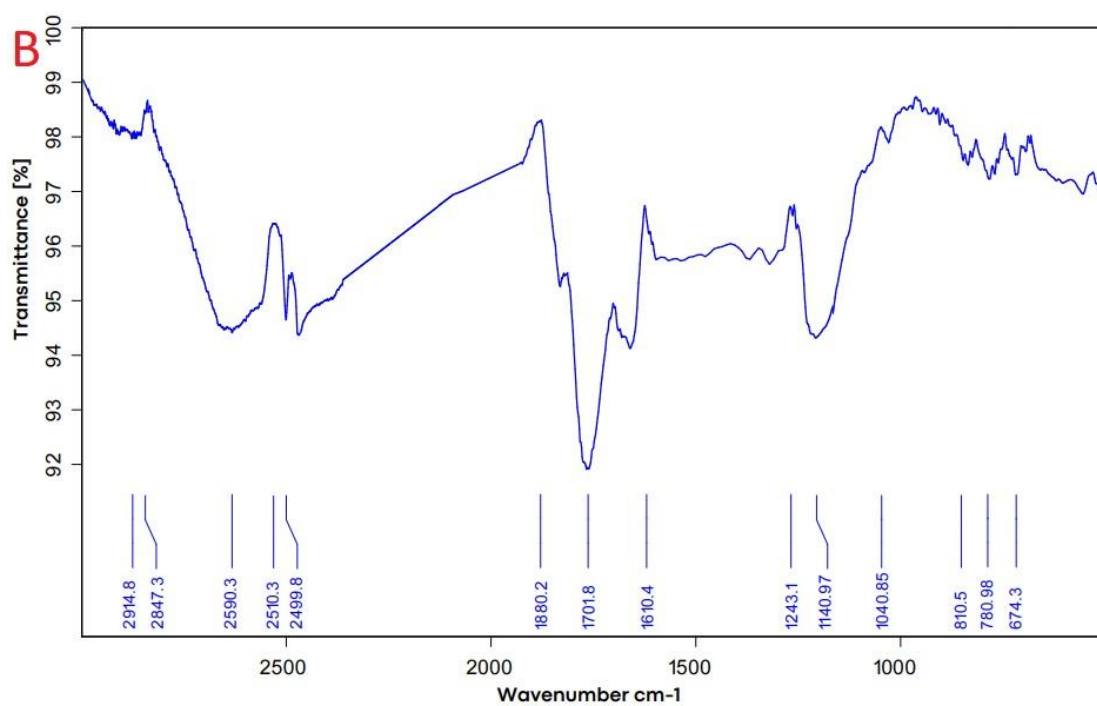

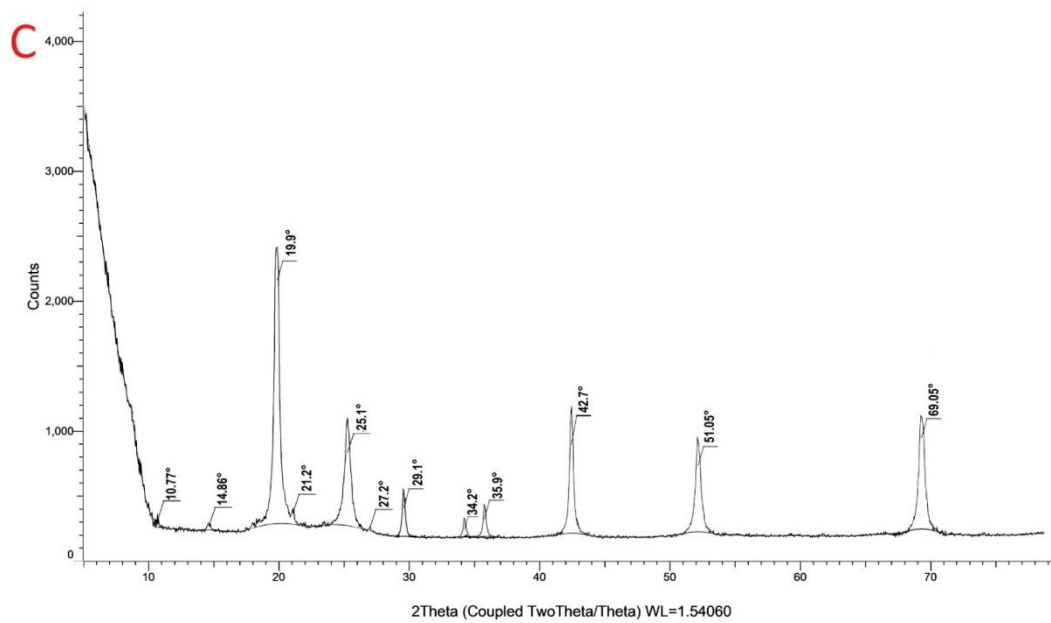

**Figure. 3** Phytofabricated MS-ZVI@PP characterization a) UV-visible spectrum; b) FTIR spectra; c) MS-ZVI@PP XRD pattern.

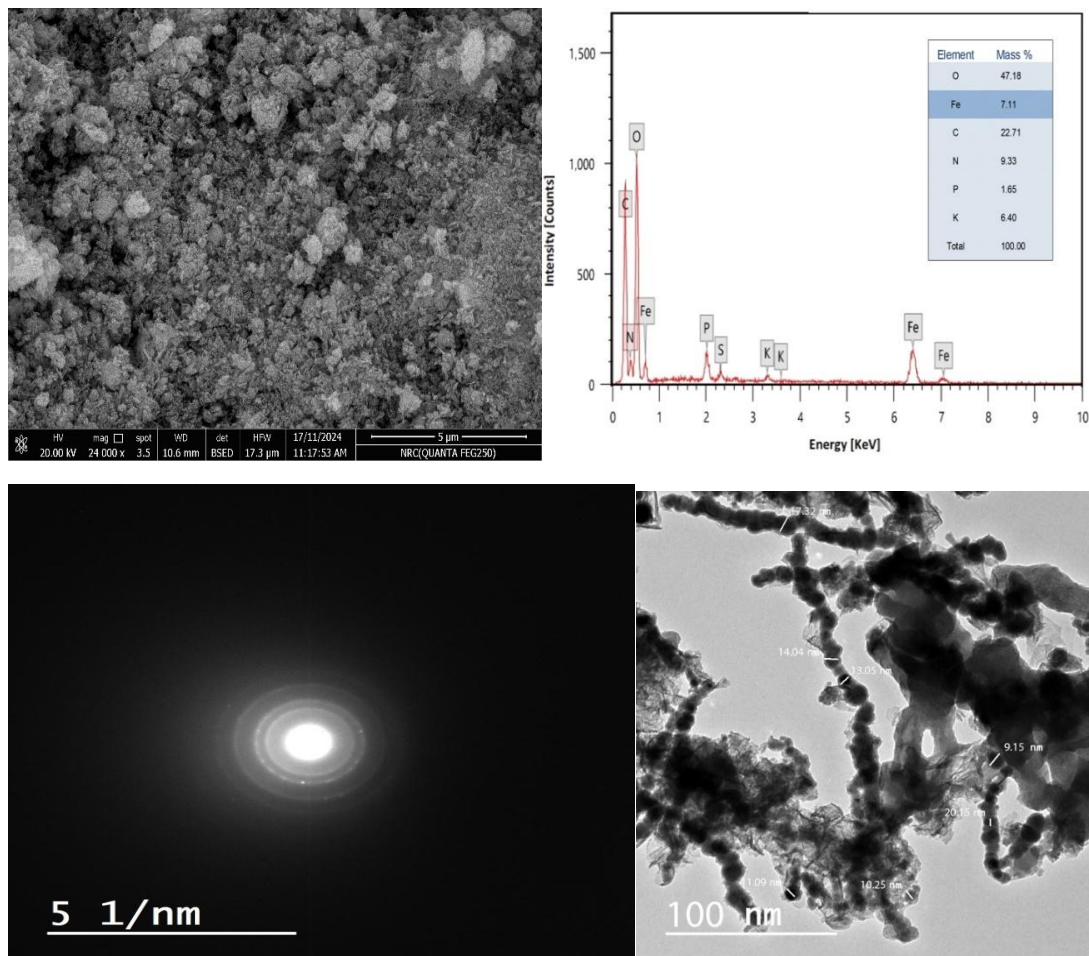

**Figure. 4** Plant-based MS-ZVI@PP morphological characterization: a) SEM pictures magnified by 5  $\mu\text{m}$ ; b) EDX analysis; c & d) TEM images.

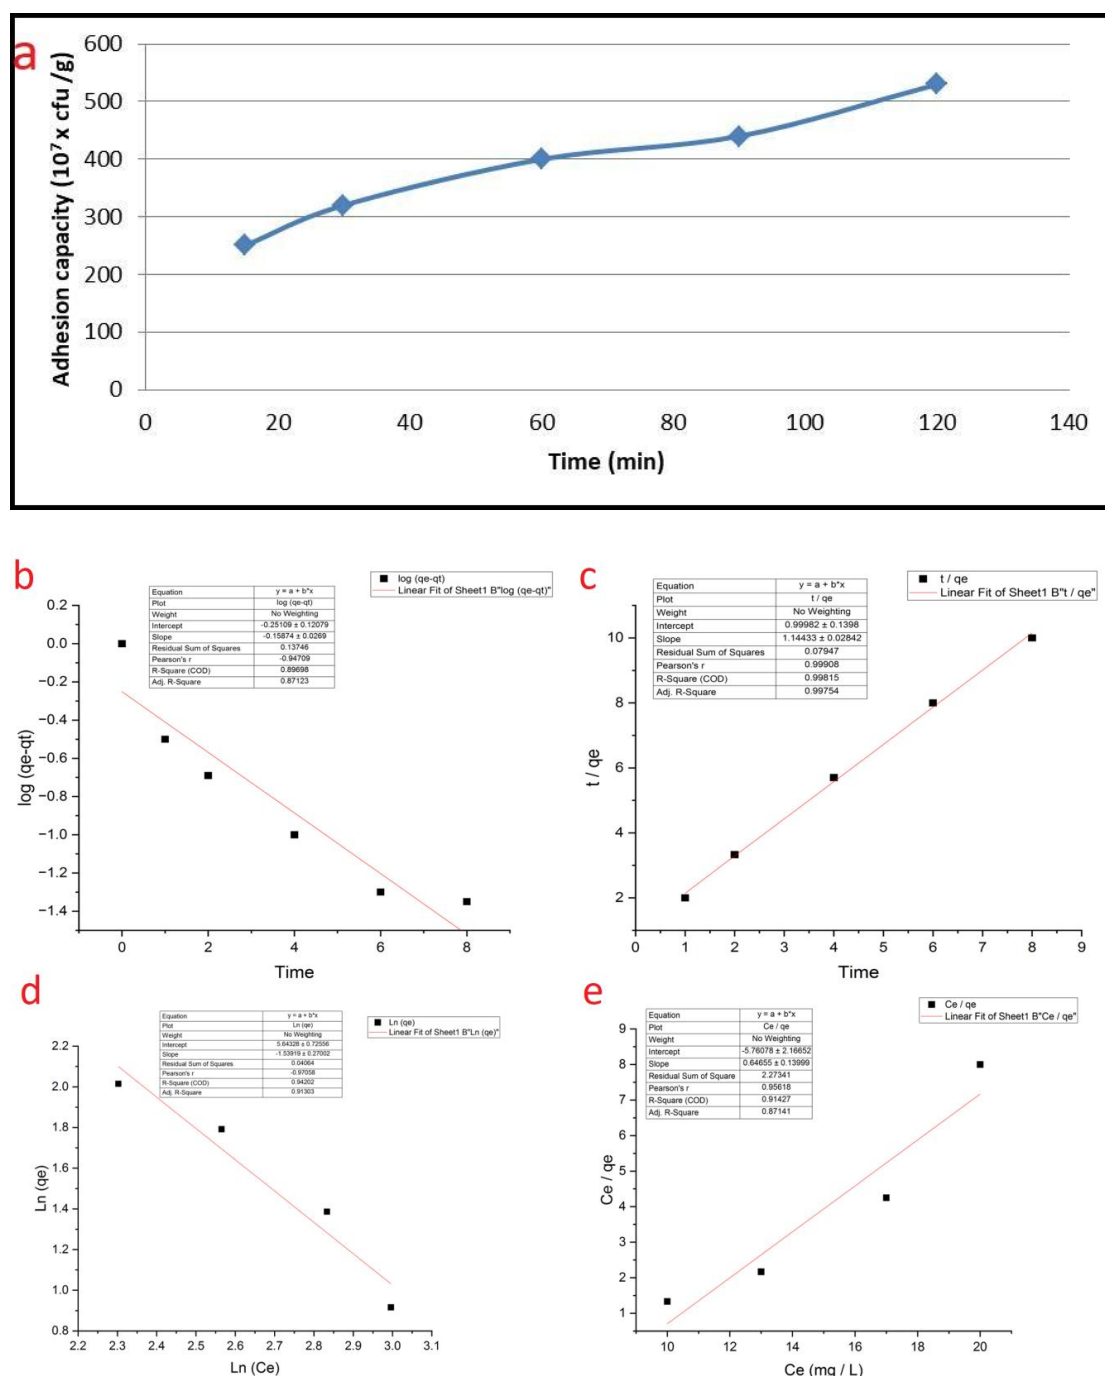

**Figure. 5** Plots of kinetic and isothermal models that describe the adherence of *E. coli*-PQ795799.1 onto MS-ZVI@PP. Adhesion capacity (a); Freundlich isotherm Langmuir isotherm; pseudo-first-order model (b); pseudo-second-order model (c); and Langmuir isotherm (e).

a

Predicted vs Actual Values

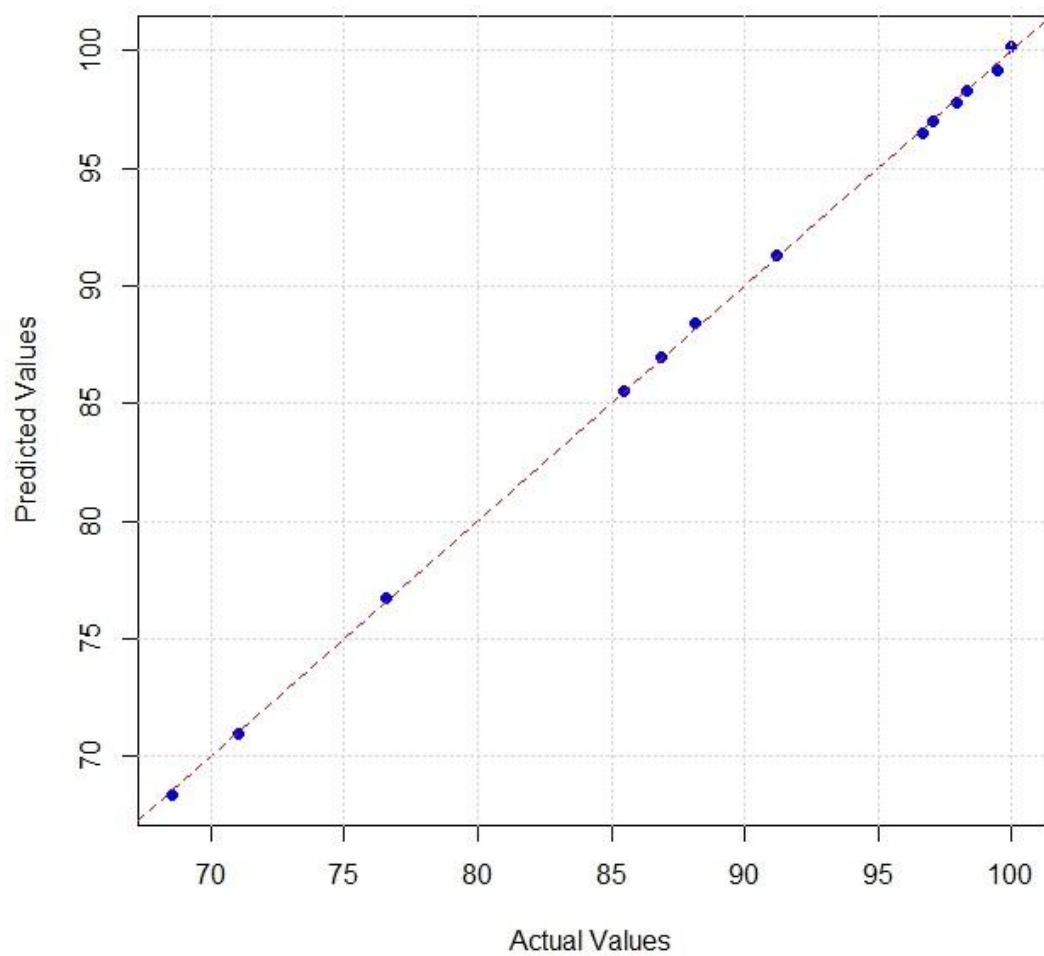

**b**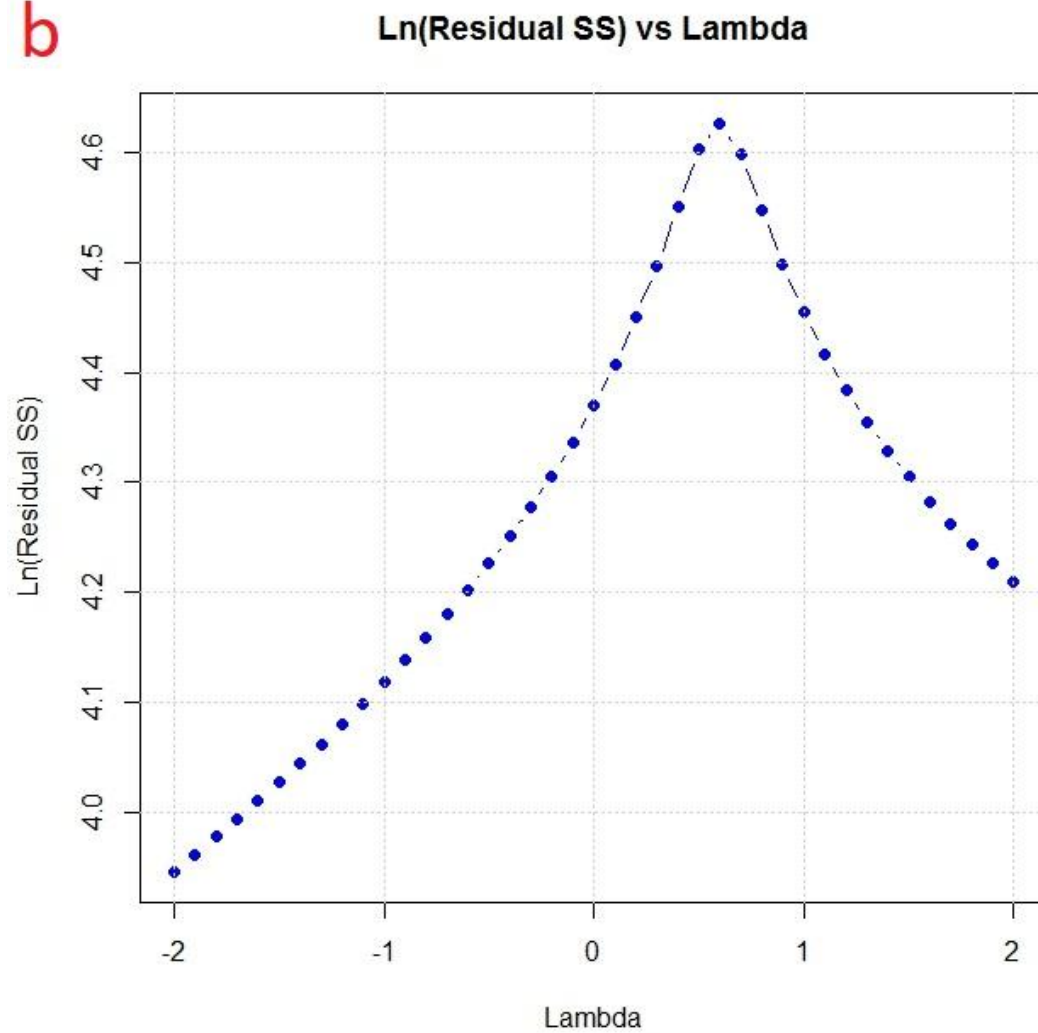

**Figure. 6** Plot of expected versus real values of *E. coli* elimination by Ms-nZVI@pp (a) and (b) Box–Cox plot of model transformation

**a**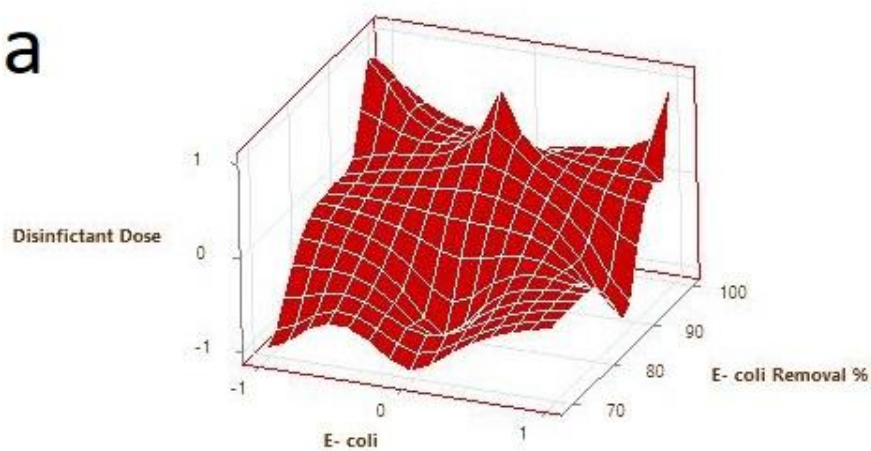



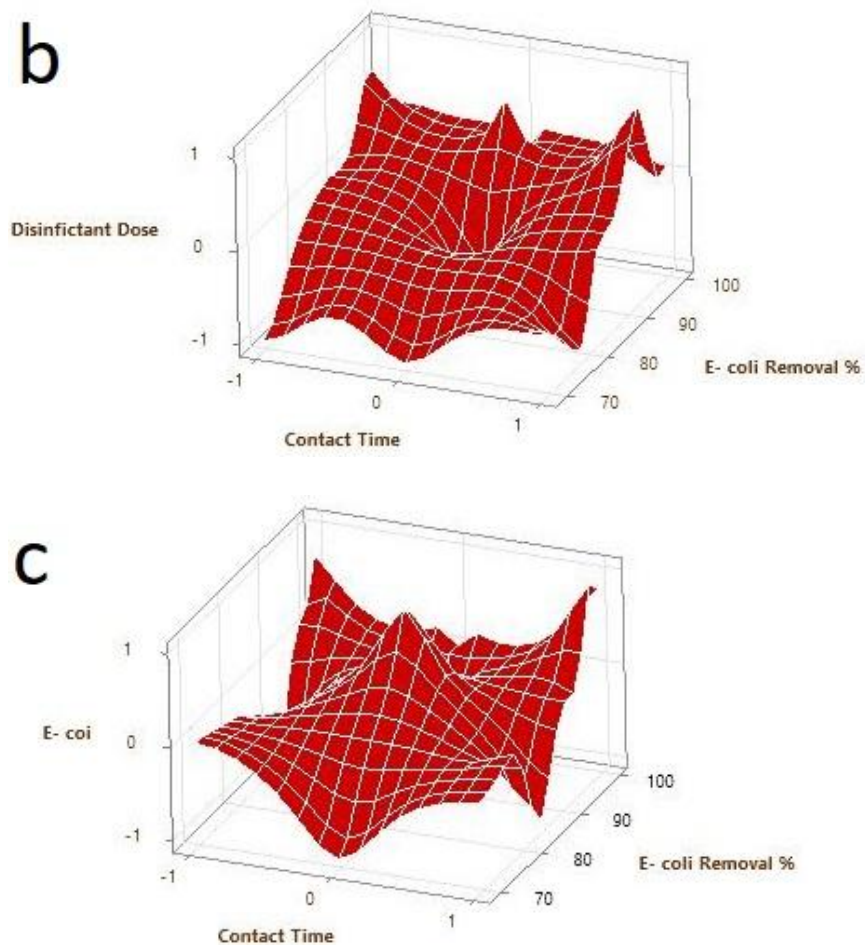

**Figure. 7** Response surface plots showing *E. coli*- PQ795799.1 removal efficiency (%) vs. (a) contact time and disinfectant dose, (b) *E. coli* concentration and disinfectant dose, and (c) contact time and *E. coli* concentration

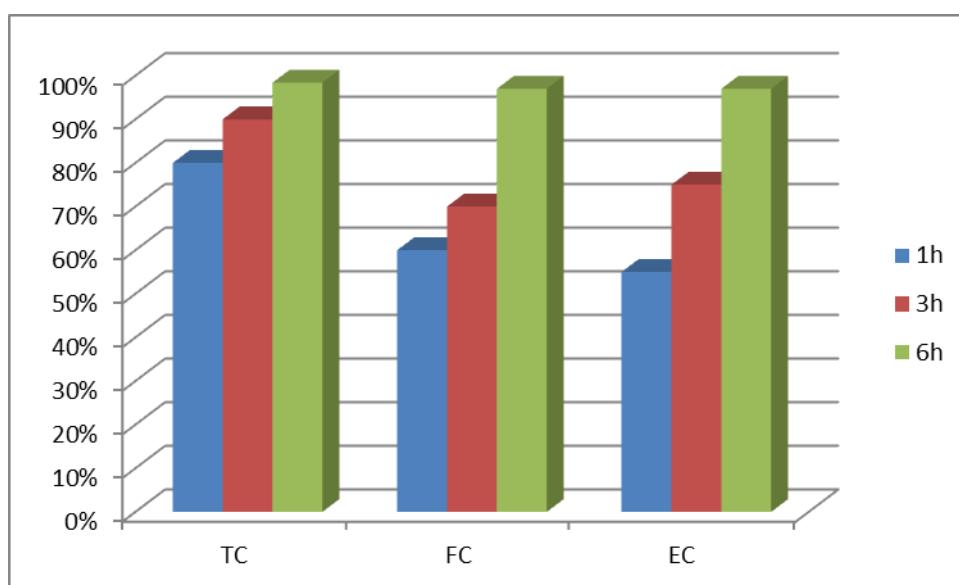

**Figure. 8** Bacteria removal efficiency concerning contact time of immobilized phytofabricated MS-ZVI@PP. The mean  $\pm$  SE of three duplicate tests is used to express the data, and columns with different letters denote significant differences at p.

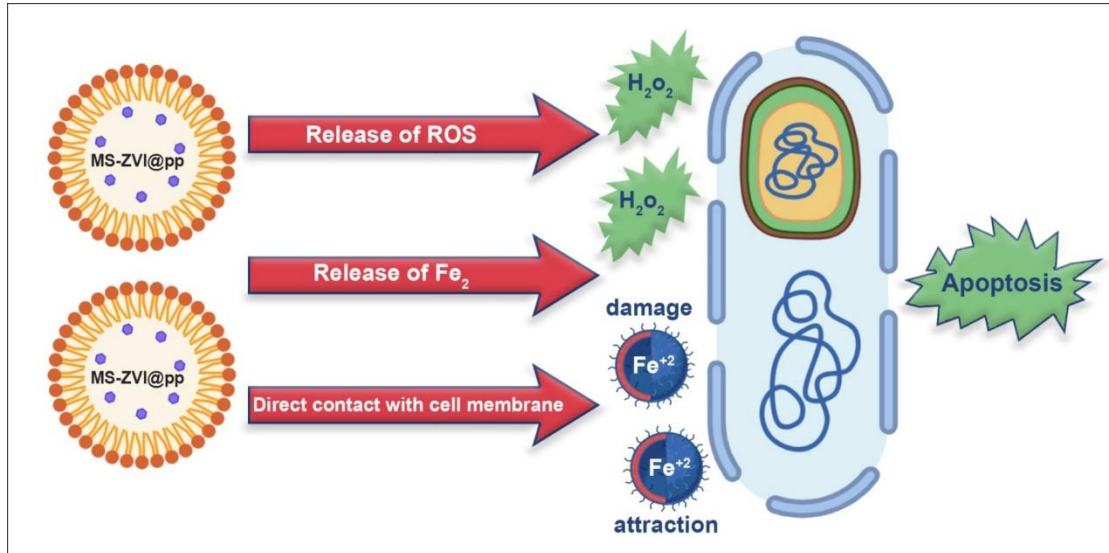

**Figure 9** Disinfection mechanism of phytofabricated MS-ZVI@PP
